# Supplementary material for: Perspectives on the Evolution of Porcine Parvovirus
Source: PubMed Central journal article supplement (PMC5580453; doi:10.3390/v9080196), 2017-07-26
Supplement: viruses-09-00196-s001.pdf [file viruses-09-00196-s001.pdf]

Supplementary Table 1. Result of retrospective detection of PPV in nine provinces of South Korea from March 2013 to March 2017.

| Sampling sites | Sampling years |      |      |      |
|----------------|----------------|------|------|------|
|                | 2013           | 2014 | 2015 | 2016 |
| Gyeonggi       | 51             | 10   | 28   | 79   |
| Gangwon        | 25             | 4    | 14   | 30   |
| Chungnam       | 29             | 5    | 20   | 28   |
| Chungbuk       | 17             | 7    | 13   | 27   |
| Jeonbuk        | 22             | 5    | 9    | 19   |
| Jeonnam        | 19             | 4    | 17   | 33   |
| Gyeongbuk      | 23             | 4    | 15   | 30   |
| Gyeongnam      | 28             | 6    | 16   | 25   |
| Jeju           | 11             | 0    | 10   | 18   |
| Total          | 225            | 45   | 142  | 289  |

Supplementary Table 2. List of NS1, VP1, and VP2 sequences used in this study. The strain isolated in South Korea 2016 was named T142\_South Korea in this study.

|    | Gene                 | Country     | Year | Accession no. |
|----|----------------------|-------------|------|---------------|
| 1  | <i>NS1, VP1, VP2</i> | South Korea | 2016 | KY994646      |
| 2  | <i>NS1, VP1, VP2</i> | South Korea | 2003 | AY390557.1    |
| 3  | <i>NS1, VP1, VP2</i> | China       | 2004 | AY583318.1    |
| 4  | <i>NS1, VP1, VP2</i> | China       | 2006 | EU790641.1    |
| 5  | <i>NS1, VP1, VP2</i> | China       | 2013 | KX242359.1    |
| 6  | <i>NS1, VP1, VP2</i> | China       | 2015 | KX233726.1    |
| 7  | <i>NS1, VP1, VP2</i> | USA         | 1976 | NC_001718.1   |
| 8  | <i>NS1, VP1, VP2</i> | China       | 1989 | HM989009.1    |
| 9  | <i>NS1, VP1, VP2</i> | China       | 2007 | KJ201928.1    |
| 10 | <i>NS1, VP1, VP2</i> | China       | 2009 | KJ201927.1    |
| 11 | <i>NS1, VP1, VP2</i> | China       | 2013 | KF742500.2    |
| 12 | <i>NS1, VP1, VP2</i> | China       | 2008 | JX992846.1    |
| 13 | <i>NS1, VP1, VP2</i> | China       | 2010 | JN968975.1    |
| 14 | <i>NS1, VP1, VP2</i> | China       | 2011 | JN860197.1    |
| 15 | <i>NS1, VP1, VP2</i> | China       | 2010 | JN872448.1    |
| 16 | <i>NS1, VP1, VP2</i> | Austria     | 2009 | JN400519.1    |
| 17 | <i>NS1, VP1, VP2</i> | Germany     | 2009 | JN400518.1    |
| 18 | <i>NS1, VP1, VP2</i> | Germany     | 2009 | JN400517.1    |
| 19 | <i>NS1, VP1, VP2</i> | Germany     | 2009 | JN400516.1    |
| 20 | <i>NS1, VP1, VP2</i> | USA         | 2006 | GQ884047.1    |
| 21 | <i>NS1, VP1, VP2</i> | USA         | 2006 | GQ884046.1    |

|    |                      |                   |      |            |
|----|----------------------|-------------------|------|------------|
| 22 | <i>NS1, VP1, VP2</i> | USA               | 2006 | GQ884045.1 |
| 23 | <i>NS1, VP1, VP2</i> | Europe            | 2006 | GQ884044.1 |
| 24 | <i>NS1, VP1, VP2</i> | Europe            | 2006 | GQ884043.1 |
| 25 | <i>NS1, VP1, VP2</i> | Europe            | 2006 | GQ884042.1 |
| 26 | <i>NS1, VP1, VP2</i> | Europe            | 2006 | GQ884041.1 |
| 27 | <i>NS1, VP1, VP2</i> | Europe            | 2005 | GQ884040.1 |
| 28 | <i>NS1, VP1, VP2</i> | Europe            | 2005 | GQ884039.1 |
| 29 | <i>NS1, VP1, VP2</i> | Europe            | 2005 | GQ884038.1 |
| 30 | <i>NS1, VP1, VP2</i> | Europe            | 2005 | GQ884037.1 |
| 31 | <i>NS1, VP1, VP2</i> | Europe            | 2005 | GQ884036.1 |
| 32 | <i>NS1, VP1, VP2</i> | Europe            | 2006 | GQ884035.1 |
| 33 | <i>NS1, VP1, VP2</i> | USA               | 1985 | U44978.1   |
| 34 | <i>NS1, VP1, VP2</i> | China             | 2004 | EU790642.1 |
| 35 | <i>NS1, VP1, VP2</i> | China             | 2006 | DQ675456.1 |
| 36 | <i>NS1, VP1, VP2</i> | Germany           | 2002 | AY684869.1 |
| 37 | <i>NS1, VP1, VP2</i> | China             | 2008 | FJ822038.1 |
| 38 | <i>NS1, VP1, VP2</i> | Germany           | 1964 | AY684872.1 |
| 39 | <i>NS1, VP1, VP2</i> | United<br>Kingdom | 1986 | AY684866.1 |
| 40 | <i>NS1, VP1, VP2</i> | China             | 2013 | KM268633.1 |
| 41 | <i>NS1, VP1, VP2</i> | China             | 2009 | HM627653.1 |
| 42 | <i>NS1, VP1, VP2</i> | China             | 2010 | HM627652.1 |
| 43 | <i>NS1</i>           | China             | 2003 | AY502114.1 |
| 44 | <i>NS1</i>           | China             | 2013 | KF429255.1 |
| 45 | <i>NS1</i>           | China             | 2013 | KF429254.1 |
| 46 | <i>NS1</i>           | China             | 2012 | KF429253.1 |
| 47 | <i>NS1</i>           | China             | 2012 | KF429252.1 |

|    |                 |             |      |            |
|----|-----------------|-------------|------|------------|
| 48 | <i>NS1</i>      | China       | 2011 | JQ085425.1 |
| 49 | <i>NS1</i>      | Denmark     | 2011 | JX568153.1 |
| 50 | <i>NS1</i>      | China       | 2010 | JQ710893.1 |
| 51 | <i>NS1</i>      | China       | 2011 | JQ710892.1 |
| 52 | <i>NS1</i>      | China       | 2010 | JQ710891.1 |
| 53 | <i>NS1</i>      | China       | 2011 | JQ710890.1 |
| 54 | <i>NS1</i>      | China       | 2011 | JQ710889.1 |
| 55 | <i>NS1</i>      | China       | 2011 | JQ710888.1 |
| 56 | <i>NS1</i>      | China       | 2010 | JQ710887.1 |
| 57 | <i>NS1</i>      | China       | 2010 | JQ710886.1 |
| 58 | <i>NS1</i>      | Germany     | 1999 | JN400525.1 |
| 59 | <i>NS1</i>      | Switzerland | 2009 | JN400524.1 |
| 60 | <i>NS1</i>      | Switzerland | 2009 | JN400523.1 |
| 61 | <i>NS1</i>      | Germany     | 2002 | JN400522.1 |
| 62 | <i>NS1</i>      | Germany     | 2001 | JN400521.1 |
| 63 | <i>NS1</i>      | China       | 2006 | DQ499631.2 |
| 64 | <i>NS1</i>      | China       | 2008 | FJ853420.1 |
| 65 | <i>NS1</i>      | China       | 2008 | EU707335.1 |
| 66 | <i>NS1</i>      | China       | 2012 | JX871883.1 |
| 67 | <i>NS1</i>      | China       | 2004 | AY789534.1 |
| 68 | <i>NS1</i>      | China       | 2004 | AY789533.1 |
| 69 | <i>NS1</i>      | China       | 2004 | AY789532.1 |
| 70 | <i>NS1</i>      | China       | 2004 | AY686601.1 |
| 71 | <i>NS1</i>      | China       | 2010 | HM355808.1 |
| 72 | <i>VP1, VP2</i> | Romania     | 2011 | JQ249926.1 |
| 73 | <i>VP1, VP2</i> | Romania     | 2011 | JQ249927.1 |
| 74 | <i>VP1, VP2</i> | Romania     | 2011 | JQ249925.1 |

|     |                 |             |      |            |
|-----|-----------------|-------------|------|------------|
| 75  | <i>VP1, VP2</i> | Romania     | 2011 | JQ249924.1 |
| 76  | <i>VP1, VP2</i> | Romania     | 2011 | JQ249923.1 |
| 77  | <i>VP1, VP2</i> | Romania     | 2011 | JQ249922.1 |
| 78  | <i>VP1, VP2</i> | Romania     | 2011 | JQ249921.1 |
| 79  | <i>VP1, VP2</i> | Romania     | 2011 | JQ249920.1 |
| 80  | <i>VP1, VP2</i> | Romania     | 2011 | JQ249919.1 |
| 81  | <i>VP1, VP2</i> | Romania     | 2011 | JQ249918.1 |
| 82  | <i>VP1, VP2</i> | Romania     | 2011 | JQ249917.1 |
| 83  | <i>VP1, VP2</i> | Romania     | 2011 | JQ249916.1 |
| 84  | <i>VP1, VP2</i> | Romania     | 2011 | JQ249915.1 |
| 85  | <i>VP1, VP2</i> | Romania     | 2011 | JQ249914.1 |
| 86  | <i>VP1, VP2</i> | Romania     | 2011 | JQ249913.1 |
| 87  | <i>VP1, VP2</i> | Germany     | 2001 | AY684871.1 |
| 88  | <i>VP1, VP2</i> | Switzerland | 2009 | JN400520.1 |
| 89  | <i>VP1, VP2</i> | Germany     | 2002 | AY684870.1 |
| 90  | <i>VP1, VP2</i> | Germany     | 2001 | AY684868.1 |
| 91  | <i>VP1, VP2</i> | Germany     | 2002 | AY684867.1 |
| 92  | <i>VP1, VP2</i> | Germany     | 2001 | AY684865.1 |
| 93  | <i>VP1, VP2</i> | Germany     | 2002 | AY684864.1 |
| 94  | <i>VP1, VP2</i> | Germany     | 2010 | KC296746.1 |
| 95  | <i>VP1, VP2</i> | Germany     | 2010 | KC296745.1 |
| 96  | <i>VP1, VP2</i> | Germany     | 2010 | KC296744.1 |
| 97  | <i>VP1, VP2</i> | Germany     | 2010 | KC296743.1 |
| 98  | <i>VP2</i>      | China       | 2010 | JQ686669.1 |
| 99  | <i>VP2</i>      | China       | 2004 | AY686602.1 |
| 100 | <i>VP2</i>      | China       | 2006 | DQ464345.1 |
| 101 | <i>VP2</i>      | China       | 2008 | FJ853421.1 |

|     |            |       |      |            |
|-----|------------|-------|------|------------|
| 102 | <i>VP2</i> | China | 2003 | AY502115.1 |
| 103 | <i>VP2</i> | China | 2003 | AY459350.1 |
| 104 | <i>VP2</i> | China | 2010 | HM355807.1 |

Supplementary Table 3. Additional data about similarity values of nucleotides and amino acids between strain 1–5 and other 70 strains (back data for table 4) (Strain 1–5: sample collected 1900–2000, Strain 6–22: 2001–2005, Strain 23–49: 2006–2010, Strain 50–75: 2011–2016). (Strain 1: Kresse, Strain 2: Germany IDT, Strain 3: NADL2, Strain 4: Challenge, Strain 5: China 1989; Accession numbers: U44978.1, AY684872.1, NC\_001718.1, AY684866.1, HM989009.1)

Nucleotide

|     | 6    | 7    | 8    | 9    | 10   | 11   | 12   | 13   | 14   | 15   | 16   | 17   | 18   | 19   | 20   | 21   | 22   |      |     |     |     |     |     |     |     |     |     |  |
|-----|------|------|------|------|------|------|------|------|------|------|------|------|------|------|------|------|------|------|-----|-----|-----|-----|-----|-----|-----|-----|-----|--|
| 1   | 98.4 | 98.3 | 99.3 | 99.7 | 99.2 | 99.4 | 98.4 | 98.4 | 97.7 | 97.8 | 98.3 | 98.3 | 98.4 | 98.3 | 98.3 | 98.3 | 98.3 | 99.0 |     |     |     |     |     |     |     |     |     |  |
| 2   | 99.3 | 99.1 | 98.8 | 98.7 | 98.6 | 98.9 | 99.0 | 99.3 | 98.5 | 98.6 | 99.1 | 99.3 | 99.2 | 99.3 | 99.3 | 99.3 | 99.3 | 98.8 |     |     |     |     |     |     |     |     |     |  |
| 3   | 99.5 | 99.4 | 99.0 | 98.9 | 99.0 | 99.1 | 99.2 | 99.6 | 98.6 | 98.7 | 99.5 | 99.5 | 99.6 | 99.5 | 99.5 | 99.5 | 99.5 | 99.0 |     |     |     |     |     |     |     |     |     |  |
| 4   | 99.4 | 99.2 | 98.9 | 98.7 | 98.8 | 98.9 | 99.0 | 99.4 | 98.7 | 98.7 | 99.3 | 99.3 | 99.4 | 99.3 | 99.3 | 99.3 | 99.3 | 98.9 |     |     |     |     |     |     |     |     |     |  |
| 5   | 99.4 | 99.3 | 98.7 | 98.6 | 98.7 | 98.8 | 99.1 | 99.3 | 98.5 | 98.6 | 99.2 | 99.3 | 99.3 | 99.3 | 99.3 | 99.3 | 99.3 | 98.7 |     |     |     |     |     |     |     |     |     |  |
|     |      |      |      |      |      |      |      |      |      |      |      |      |      |      |      |      |      |      |     |     |     |     |     |     |     |     |     |  |
|     | 23   | 24   | 25   | 26   | 27   | 28   | 29   | 30   | 31   | 32   | 33   | 34   | 35   | 36   | 37   | 38   | 39   | 40   | 41  | 42  | 43  | 44  | 45  | 46  | 47  | 48  | 49  |  |
| 1   | 98.  | 98.  | 98.  | 98.  | 98.  | 97.  | 98.  | 98.  | 98.  | 98.  | 98.  | 98.  | 97.  | 98.  | 98.  | 98.  | 98.  | 98.  | 98. | 98. | 98. | 98. | 98. | 98. | 99. | 98. | 98. |  |
| 6   | 5    | 7    | 5    | 4    | 9    | 5    | 4    | 3    | 2    | 1    | 5    | 7    | 3    | 1    | 4    | 9    | 2    | 3    | 4   | 4   | 3   | 8   | 3   | 2   | 4   | 9   |     |  |
| 2   | 99.  | 99.  | 99.  | 99.  | 99.  | 98.  | 99.  | 99.  | 99.  | 99.  | 98.  | 99.  | 98.  | 99.  | 98.  | 99.  | 98.  | 99.  | 99. | 99. | 99. | 99. | 99. | 99. | 98. | 99. | 98. |  |
| 4   | 3    | 4    | 6    | 3    | 9    | 3    | 3    | 3    | 0    | 9    | 6    | 5    | 1    | 9    | 1    | 6    | 1    | 1    | 3   | 3   | 4   | 4   | 2   | 7   | 3   | 7   |     |  |
| 3   | 99.  | 99.  | 99.  | 99.  | 99.  | 99.  | 99.  | 99.  | 98.  | 98.  | 99.  | 98.  | 99.  | 98.  | 99.  | 98.  | 99.  | 99.  | 99. | 99. | 99. | 99. | 99. | 99. | 99. | 99. | 98. |  |
| 7   | 7    | 8    | 5    | 6    | 1    | 6    | 6    | 5    | 9    | 9    | 5    | 6    | 5    | 9    | 5    | 7    | 4    | 3    | 5   | 5   | 4   | 7   | 4   | 0   | 5   | 8   |     |  |
| 4   | 99.  | 99.  | 99.  | 99.  | 99.  | 98.  | 99.  | 99.  | 99.  | 98.  | 98.  | 99.  | 98.  | 99.  | 98.  | 99.  | 98.  | 99.  | 99. | 99. | 99. | 99. | 99. | 99. | 98. | 99. | 98. |  |
| 5   | 5    | 6    | 5    | 4    | 9    | 4    | 4    | 3    | 9    | 8    | 5    | 7    | 3    | 8    | 3    | 5    | 2    | 1    | 4   | 4   | 3   | 5   | 3   | 8   | 4   | 6   |     |  |
| 99. | 99.  | 99.  | 99.  | 99.  | 98.  | 99.  | 99.  | 99.  | 99.  | 98.  | 99.  | 98.  | 99.  | 98.  | 99.  | 98.  | 99.  | 99.  | 99. | 99. | 99. | 99. | 99. | 99. | 98. | 99. | 98. |  |
| 4   | 3    | 4    | 9    | 3    | 9    | 3    | 3    | 3    | 0    | 9    | 7    | 5    | 2    | 9    | 2    | 4    | 2    | 1    | 4   | 4   | 5   | 5   | 3   | 6   | 4   | 6   |     |  |
|     |      |      |      |      |      |      |      |      |      |      |      |      |      |      |      |      |      |      |     |     |     |     |     |     |     |     |     |  |
|     | 50   | 51   | 52   | 53   | 54   | 55   | 56   | 57   | 58   | 59   | 60   | 61   | 62   | 63   | 64   | 65   | 66   | 67   | 68  | 69  | 70  | 71  | 72  | 73  | 74  | 75  |     |  |

|   |     |     |     |     |     |     |     |     |     |     |     |     |     |     |     |     |     |     |     |     |     |     |     |     |     |   |
|---|-----|-----|-----|-----|-----|-----|-----|-----|-----|-----|-----|-----|-----|-----|-----|-----|-----|-----|-----|-----|-----|-----|-----|-----|-----|---|
| 1 | 98. | 98. | 98. | 99. | 98. | 98. | 98. | 98. | 98. | 98. | 98. | 98. | 98. | 98. | 98. | 98. | 98. | 98. | 98. | 98. | 98. | 97. | 98. | 98. | 98. |   |
|   | 3   | 6   | 5   | 0   | 4   | 6   | 7   | 4   | 6   | 6   | 3   | 7   | 3   | 6   | 7   | 7   | 4   | 4   | 4   | 4   | 3   | 4   | 8   | 3   | 7   | 7 |
| 2 | 99. | 99. | 99. | 98. | 99. | 99. | 98. | 99. | 99. | 99. | 99. | 99. | 99. | 99. | 99. | 99. | 99. | 99. | 99. | 99. | 99. | 98. | 99. | 99. | 99. |   |
|   | 3   | 3   | 3   | 7   | 0   | 4   | 9   | 3   | 4   | 4   | 3   | 3   | 3   | 4   | 3   | 3   | 5   | 5   | 4   | 5   | 5   | 6   | 4   | 5   | 3   | 3 |
| 3 | 99. | 99. | 99. | 99. | 99. | 99. | 99. | 99. | 99. | 99. | 99. | 99. | 99. | 99. | 99. | 99. | 99. | 99. | 99. | 99. | 99. | 98. | 99. | 99. | 99. |   |
|   | 5   | 6   | 5   | 0   | 2   | 8   | 3   | 5   | 8   | 7   | 5   | 7   | 5   | 8   | 6   | 7   | 4   | 4   | 4   | 5   | 2   | 5   | 9   | 4   | 7   | 7 |
| 4 | 99. | 99. | 99. | 98. | 99. | 99. | 99. | 99. | 99. | 99. | 99. | 99. | 99. | 99. | 99. | 99. | 99. | 99. | 99. | 99. | 99. | 98. | 99. | 99. | 99. |   |
|   | 3   | 4   | 4   | 8   | 0   | 6   | 1   | 4   | 6   | 5   | 3   | 5   | 3   | 6   | 4   | 5   | 4   | 4   | 3   | 4   | 3   | 5   | 7   | 4   | 5   | 5 |
| 5 | 99. | 99. | 99. | 98. | 99. | 99. | 98. | 99. | 99. | 99. | 99. | 99. | 99. | 99. | 99. | 99. | 99. | 99. | 99. | 99. | 99. | 98. | 99. | 99. | 99. |   |
|   | 3   | 3   | 2   | 6   | 0   | 5   | 9   | 4   | 5   | 4   | 3   | 4   | 3   | 5   | 3   | 4   | 8   | 9   | 5   | 6   | 7   | 7   | 5   | 7   | 4   | 4 |

### Amino acid

|   | 6    | 7    | 8    | 9    | 10   | 11   | 12   | 13   | 14   | 15   | 16   | 17   | 18   | 19   | 20   | 21   | 22   |
|---|------|------|------|------|------|------|------|------|------|------|------|------|------|------|------|------|------|
| 1 | 97.4 | 97.2 | 98.4 | 99.0 | 98.1 | 98.8 | 97.4 | 97.1 | 95.0 | 95.2 | 97.6 | 96.9 | 97.8 | 97.2 | 97.2 | 97.2 | 98.1 |
| 2 | 98.6 | 98.4 | 98.4 | 98.3 | 97.6 | 98.3 | 97.8 | 98.3 | 96.0 | 96.2 | 98.8 | 98.1 | 98.8 | 98.4 | 98.4 | 98.4 | 98.1 |
| 3 | 99.5 | 99.3 | 98.8 | 98.3 | 98.4 | 98.4 | 98.3 | 99.1 | 96.4 | 96.5 | 99.7 | 99.0 | 99.8 | 99.3 | 99.3 | 99.3 | 98.4 |
| 4 | 98.8 | 98.6 | 98.1 | 97.6 | 97.8 | 97.8 | 97.6 | 98.4 | 96.2 | 96.4 | 99.0 | 98.3 | 99.1 | 98.6 | 98.6 | 98.6 | 97.8 |
| 5 | 98.6 | 98.4 | 97.8 | 97.6 | 97.6 | 97.6 | 97.9 | 98.3 | 96.0 | 96.2 | 98.8 | 98.1 | 98.8 | 98.4 | 98.4 | 98.4 | 97.4 |

|   | 23  | 24  | 25  | 26  | 27  | 28  | 29  | 30  | 31  | 32  | 33  | 34  | 35  | 36  | 37  | 38  | 39  | 40  | 41  | 42  | 43  | 44  | 45  | 46  | 47  | 48  | 49  |
|---|-----|-----|-----|-----|-----|-----|-----|-----|-----|-----|-----|-----|-----|-----|-----|-----|-----|-----|-----|-----|-----|-----|-----|-----|-----|-----|-----|
| 1 | 97. | 97. | 97. | 97. | 97. | 96. | 97. | 97. | 97. | 97. | 96. | 97. | 95. | 96. | 96. | 97. | 98. | 97. | 97. | 97. | 97. | 97. | 98. | 97. | 98. | 97. | 98. |
|   | 6   | 8   | 9   | 2   | 8   | 7   | 6   | 8   | 2   | 1   | 9   | 2   | 0   | 7   | 9   | 4   | 3   | 2   | 2   | 2   | 2   | 2   | 1   | 2   | 3   | 2   | 4   |
| 2 | 98. | 98. | 99. | 99. | 99. | 97. | 98. | 99. | 98. | 98. | 97. | 99. | 96. | 97. | 97. | 98. | 98. | 98. | 98. | 98. | 98. | 98. | 99. | 98. | 98. | 98. | 98. |
|   | 8   | 8   | 0   | 0   | 0   | 9   | 8   | 0   | 4   | 1   | 8   | 0   | 0   | 9   | 8   | 6   | 3   | 4   | 4   | 4   | 4   | 8   | 1   | 4   | 3   | 4   | 4   |
| 3 | 99. | 99. | 10  | 99. | 99. | 99. | 99. | 99. | 99. | 97. | 97. | 99. | 96. | 98. | 97. | 99. | 98. | 99. | 99. | 99. | 99. | 98. | 99. | 99. | 98. | 99. | 98. |
|   | 7   | 8   | 0   | 0   | 8   | 8   | 7   | 8   | 3   | 8   | 6   | 0   | 4   | 8   | 6   | 5   | 6   | 3   | 3   | 3   | 3   | 8   | 8   | 3   | 6   | 3   | 8   |
| 4 | 99. | 99. | 99. | 98. | 99. | 98. | 99. | 99. | 98. | 97. | 97. | 98. | 96. | 98. | 97. | 98. | 97. | 98. | 98. | 98. | 98. | 98. | 99. | 98. | 97. | 98. | 98. |
|   | 0   | 1   | 3   | 6   | 1   | 1   | 0   | 1   | 6   | 4   | 2   | 6   | 2   | 1   | 2   | 8   | 9   | 6   | 6   | 6   | 6   | 4   | 1   | 6   | 9   | 6   | 1   |
| 5 | 98. | 98. | 99. | 99. | 99. | 97. | 98. | 99. | 98. | 97. | 97. | 99. | 96. | 97. | 97. | 98. | 97. | 98. | 98. | 98. | 98. | 98. | 99. | 98. | 97. | 98. | 97. |
|   | 8   | 8   | 0   | 7   | 0   | 9   | 8   | 0   | 4   | 6   | 4   | 0   | 0   | 0   | 4   | 6   | 6   | 4   | 4   | 4   | 4   | 8   | 1   | 4   | 6   | 4   | 8   |



|   | 50  | 51  | 52  | 53  | 54  | 55  | 56  | 57  | 58  | 59  | 60  | 61  | 62  | 63  | 64  | 65  | 66  | 67  | 68  | 69  | 70  | 71  | 72  | 73  | 74  | 75  |
|---|-----|-----|-----|-----|-----|-----|-----|-----|-----|-----|-----|-----|-----|-----|-----|-----|-----|-----|-----|-----|-----|-----|-----|-----|-----|-----|
| 1 | 97. | 97. | 98. | 98. | 97. | 97. | 97. | 97. | 97. | 97. | 97. | 97. | 97. | 97. | 97. | 97. | 97. | 97. | 97. | 97. | 97. | 97. | 95. | 96. | 97. | 97. |
|   | 2   | 9   | 1   | 1   | 8   | 8   | 8   | 2   | 8   | 6   | 2   | 8   | 2   | 6   | 8   | 9   | 2   | 4   | 2   | 2   | 2   | 2   | 7   | 9   | 8   | 9   |
| 2 | 98. | 99. | 99. | 98. | 99. | 99. | 98. | 98. | 99. | 98. | 98. | 99. | 98. | 98. | 99. | 99. | 98. | 98. | 98. | 99. | 99. | 99. | 96. | 98. | 98. | 99. |
|   | 4   | 0   | 1   | 1   | 0   | 0   | 8   | 4   | 0   | 8   | 4   | 0   | 4   | 8   | 0   | 0   | 6   | 8   | 6   | 0   | 0   | 0   | 9   | 6   | 8   | 0   |
| 3 | 99. | 99. | 99. | 98. | 99. | 99. | 99. | 99. | 99. | 99. | 99. | 99. | 99. | 99. | 99. | 10  | 98. | 98. | 98. | 99. | 98. | 99. | 97. | 98. | 99. | 10  |
|   | 3   | 7   | 8   | 4   | 8   | 8   | 5   | 3   | 8   | 7   | 3   | 8   | 3   | 7   | 8   | 0   | 6   | 6   | 4   | 0   | 4   | 0   | 8   | 6   | 8   | 0   |
| 4 | 98. | 99. | 99. | 97. | 99. | 99. | 98. | 98. | 99. | 99. | 98. | 99. | 98. | 99. | 99. | 99. | 98. | 98. | 98. | 98. | 98. | 98. | 97. | 98. | 99. | 99. |
|   | 6   | 0   | 1   | 8   | 1   | 1   | 8   | 6   | 1   | 0   | 6   | 1   | 6   | 0   | 1   | 3   | 3   | 3   | 1   | 6   | 1   | 6   | 1   | 3   | 1   | 3   |
| 5 | 98. | 98. | 98. | 97. | 99. | 99. | 98. | 98. | 99. | 98. | 98. | 99. | 98. | 98. | 99. | 99. | 99. | 99. | 98. | 99. | 99. | 99. | 96. | 99. | 98. | 99. |
|   | 4   | 6   | 8   | 4   | 0   | 0   | 4   | 4   | 0   | 8   | 4   | 0   | 4   | 8   | 0   | 0   | 3   | 7   | 4   | 0   | 1   | 0   | 9   | 0   | 8   | 0   |





|     |   |   |   |   |   |   |   |   |   |   |   |   |  |   |   |   |   |   |  |   |  |   |  |   |   |
|-----|---|---|---|---|---|---|---|---|---|---|---|---|--|---|---|---|---|---|--|---|--|---|--|---|---|
| 419 |   | Q |   |   | Q |   |   |   |   |   |   |   |  | Q | Q | Q | Q |   |  | Q |  | Q |  | Q |   |
| 436 | A | T | A | T | T | A | A | S | A | T | A | A |  | T | T | T | T | S |  | T |  | T |  | T |   |
| 439 |   |   |   |   |   |   |   |   | Y |   |   |   |  |   |   |   |   |   |  |   |  |   |  |   |   |
| 521 |   |   |   |   |   |   |   |   | H | H |   |   |  |   |   |   |   |   |  |   |  |   |  |   |   |
| 550 |   |   |   |   |   |   |   |   | P | P |   |   |  |   |   |   |   |   |  |   |  |   |  |   |   |
| 555 |   |   |   |   |   |   |   |   |   |   |   |   |  |   |   |   |   |   |  |   |  |   |  |   | K |
| 564 |   |   |   |   |   | M | M |   |   |   |   |   |  |   |   |   |   |   |  |   |  |   |  |   |   |
| 565 |   | E |   |   |   |   |   | R | R |   |   |   |  |   |   |   |   |   |  |   |  |   |  |   | R |
| 570 |   |   |   |   |   | H | H |   | H | H | H |   |  |   |   |   |   |   |  |   |  |   |  |   |   |

|     |    |    |    |    |    |    |    |    |    |    |    |    |    |    |    |    |    |    |    |    |    |    |    |    |
|-----|----|----|----|----|----|----|----|----|----|----|----|----|----|----|----|----|----|----|----|----|----|----|----|----|
| AA  | 51 | 52 | 53 | 54 | 55 | 56 | 57 | 58 | 59 | 60 | 61 | 62 | 63 | 64 | 65 | 66 | 67 | 68 | 69 | 70 | 71 | 72 | 73 | 74 |
| 20  |    | A  |    |    |    |    |    |    |    |    |    |    |    |    |    |    |    |    |    |    |    |    |    |    |
| 45  |    |    |    |    |    |    |    |    |    |    |    |    |    |    |    |    | T  | T  | T  | T  |    |    | T  |    |
| 82  |    | K  |    |    |    |    |    |    |    |    |    |    |    |    |    |    |    |    |    |    |    |    |    |    |
| 93  |    |    |    |    |    |    |    |    |    |    |    |    |    |    |    |    |    |    |    |    |    |    |    |    |
| 101 |    |    |    |    |    |    |    |    |    |    |    |    |    |    |    |    |    |    |    |    |    |    |    |    |
| 144 |    |    |    |    |    |    |    |    |    |    |    |    |    |    | A  | A  |    |    |    |    |    |    |    | A  |
| 215 |    |    |    |    |    |    |    |    |    |    |    |    |    |    | I  | I  | I  | I  | I  | I  |    |    |    | I  |
| 226 |    |    |    |    |    |    |    |    |    |    |    |    |    |    |    |    |    |    |    |    |    |    |    |    |
| 228 |    | E  |    |    |    | E  |    | E  | E  |    | E  |    |    |    |    |    |    |    |    |    |    |    |    |    |
| 233 |    | T  |    |    | T  |    |    |    |    |    |    |    | T  |    |    |    |    |    |    |    |    |    |    |    |
| 238 |    |    |    |    |    |    |    |    |    |    |    |    |    |    |    |    |    |    |    |    |    |    |    |    |
| 304 |    | T  |    |    |    |    |    |    |    |    |    |    |    |    |    |    |    |    |    |    |    |    |    |    |
| 320 | T  | T  |    |    |    |    |    |    |    |    |    |    |    |    |    |    |    | M  |    |    |    |    |    |    |
| 366 |    | N  |    |    | N  |    |    |    |    |    |    |    |    |    |    |    |    |    |    |    |    |    |    |    |
| 378 |    |    |    |    |    |    |    |    |    |    |    |    |    |    | D  |    | D  | D  | X  | D  |    |    | D  |    |





|     |   |   |   |  |   |   |   |   |   |   |  |   |   |   |   |   |   |   |   |   |   |   |   |   |   |
|-----|---|---|---|--|---|---|---|---|---|---|--|---|---|---|---|---|---|---|---|---|---|---|---|---|---|
| 521 |   |   |   |  |   |   |   |   |   |   |  | H | H | H |   |   |   |   |   |   |   |   |   |   |   |
| 550 |   |   |   |  |   |   |   |   |   |   |  |   | P | P |   |   |   |   |   |   |   |   |   |   |   |
| 555 |   | N | N |  | N | N | N |   | N | N |  | N | N | N | N | N | N | N | N | N | N | N | N | N | N |
| 564 | M |   |   |  |   |   |   | M |   |   |  | M |   |   |   |   |   |   |   |   |   |   |   |   |   |
| 565 |   |   |   |  |   |   |   |   |   |   |  |   | R | R |   |   |   |   |   |   |   |   |   |   |   |
| 570 |   |   |   |  |   |   |   |   |   |   |  |   | H | H |   |   |   |   |   |   |   |   |   |   |   |

|     |    |    |    |    |    |    |    |    |    |    |    |    |    |    |    |    |    |    |    |    |    |    |    |    |    |
|-----|----|----|----|----|----|----|----|----|----|----|----|----|----|----|----|----|----|----|----|----|----|----|----|----|----|
| AA  | 26 | 27 | 28 | 29 | 30 | 31 | 32 | 33 | 34 | 35 | 36 | 37 | 38 | 39 | 40 | 41 | 42 | 43 | 44 | 45 | 46 | 47 | 48 | 49 | 50 |
| 20  |    |    |    |    |    |    |    |    |    |    |    |    | A  |    |    |    |    |    |    |    | A  |    | A  |    |    |
| 45  | S  | S  | S  | S  | S  | G  | S  | S  | S  | S  | S  | S  | S  | S  | S  | S  | S  |    | S  | S  | S  | S  | S  | S  | S  |
| 82  |    |    |    |    |    |    |    |    |    |    |    |    | K  |    |    |    |    |    |    |    | K  |    | K  |    |    |
| 93  |    |    |    |    |    |    |    |    |    |    |    |    |    |    |    |    |    |    |    |    |    |    |    |    |    |
| 101 |    |    |    |    |    |    |    |    | G  |    |    |    |    |    |    |    |    |    |    |    |    |    |    |    |    |
| 144 |    |    |    |    |    |    |    | A  |    |    |    |    |    |    |    |    |    |    |    |    |    |    |    |    |    |
| 215 | T  | T  | T  | T  | T  |    |    |    | V  | T  |    | T  | T  | T  | T  | T  | T  |    | T  | T  | T  | T  | T  | T  | T  |
| 226 |    |    |    |    |    |    |    |    |    |    |    |    | E  |    |    |    |    |    |    |    | E  |    |    |    |    |
| 228 |    | E  |    |    | E  |    |    |    |    |    |    |    |    | E  | E  | E  | E  |    |    | E  |    | E  |    | E  |    |
| 233 |    |    |    |    |    |    |    |    | A  |    |    | T  | T  |    |    |    |    |    |    |    |    | T  |    | T  |    |
| 238 |    |    |    |    |    |    |    |    | P  |    |    |    |    |    |    |    |    |    |    |    |    |    |    |    |    |
| 304 |    |    |    |    |    |    |    |    |    |    |    |    | T  |    |    |    |    | S  |    |    | T  |    | T  |    |    |
| 320 | I  | I  | I  | I  | I  |    |    |    |    | I  |    | I  |    | I  | I  | I  | I  | I  | I  | I  |    | I  |    | I  |    |
| 366 |    |    |    |    |    |    |    |    |    |    |    |    | N  |    |    |    |    |    |    |    | N  |    | N  |    |    |
| 378 |    |    |    |    |    |    |    | D  |    |    |    |    |    |    |    |    |    |    | D  |    |    |    |    |    |    |
| 383 |    |    |    |    |    | H  | H  |    | H  |    | H  |    |    |    |    |    |    | H  |    |    |    |    |    |    |    |
| 391 |    |    |    |    |    | V  | V  |    | V  | V  | V  |    |    |    |    |    |    |    |    |    |    |    |    |    |    |
| 407 | K  | K  | K  | K  | K  |    |    | K  | K  | K  |    | K  |    | K  | K  | K  | K  | K  | K  | K  |    | K  |    | K  | K  |
| 414 |    | S  |    |    | S  |    |    |    |    |    |    | S  |    | S  | S  | S  | S  |    |    | S  |    | S  |    | S  |    |
